# Supplementary material for: Electrochiroptical response of a hexaarylethane derivative with a helical π-skeleton: drastic UV–Vis and CD spectral changes upon electrolysis of 4′,5′-dibromodispiro[xanthene-9,9′(9′H,10′H)-phenanthrene-10′,9″-xanthene]
Source: Royal Society of Chemistry journal article supplement (doi:10.1039/b204515j), 2002-01-01
Supplement: b204515j.pdf [file b204515j.pdf]

Supplementary Material of B204515J

**Electrochiroptical response of a hexaarylethane derivative with the helical  $\pi$ -skeleton: Drastic UV-Vis and CD spectral changes upon electrolysis of dispiro[4,5-dibromo-9,10-dihydrophenanthrene-9,9':10,9''-bi[9H]xanthene]**

by Takanori Suzuki, et al.

\*\*\*\*\*

**Crystallographic Details**

*rac-1a*: C<sub>38</sub>H<sub>22</sub>Br<sub>2</sub>O<sub>2</sub>, *M* 670.40, colorless rod from CHCl<sub>3</sub>, 0.4 x 0.15 x 0.15 mm, monoclinic *P*2<sub>1</sub>/c, *a* = 12.462(6), *b* = 15.613(7), *c* = 15.042(7) Å,  $\beta$  = 111.35(1) °, *U* = 2725(2) Å<sup>3</sup>, *D<sub>c</sub>* (*Z* = 4) = 1.633 g cm<sup>-3</sup>. A total of 6174 unique data points ( $2\theta_{\max}$  = 55.0 °) were measured at *T* = 153 K on a Rigaku Mercury CCD camera apparatus (Mo-K $\alpha$  radiation,  $\lambda$  = 0.71069 Å). Numerical absorption correction was applied ( $\mu$  = 30.19 cm<sup>-1</sup>). The structure was solved by the direct method and refined by the full-matrix least-squares method on *F* with anisotropic temperature factors for non-hydrogen atoms. Hydrogen atoms were located at the calculated positions. The final *R* and *R<sub>w</sub>* values are 0.036 and 0.043 for 3567 reflections with *I* > 3 $\sigma$ *I* and 379 parameters. The maximum residual electron density is 0.46 e Å<sup>-3</sup>. Atom numbering system is shown in Figure S1.

*rac-1b*: C<sub>40</sub>H<sub>28</sub>O<sub>2</sub>, *M* 540.66, colorless plate from CHCl<sub>3</sub>, 0.4 x 0.2 x 0.05 mm, monoclinic, *P*2<sub>1</sub>/n, *a* = 10.059(5), *b* = 14.309(7), *c* = 19.109(10) Å,  $\beta$  = 97.049(7)°, *U* = 2729(2) Å<sup>3</sup>, *D<sub>c</sub>* (*Z* = 4) = 1.315 g cm<sup>-3</sup>. A total of 6033 unique data points ( $2\theta_{\max}$  = 55.0 °) were measured at *T* = 153 K on a Rigaku Mercury CCD camera apparatus (Mo-K $\alpha$  radiation,  $\lambda$  = 0.71069 Å). Numerical absorption correction was applied ( $\mu$  = 0.79 cm<sup>-1</sup>). The structure was solved by the direct method and refined by the full-matrix least-squares method on *F* with anisotropic temperature

factors for non-hydrogen atoms. Hydrogen atoms were located at the calculated positions. The final  $R$  value is 0.057 for 2925 independent reflections with  $I > 3\sigma I$  and 379 parameters. The maximum residual electron density is 0.33 e<sup>-3</sup>. Atom numbering system is shown in Figure S2.

(*R*)-**6**: C<sub>46</sub>H<sub>40</sub>Br<sub>2</sub>O<sub>6</sub>,  $M$  848.63, colorless platelet from CHCl<sub>3</sub>-EtOH, 0.1 x 0.1 x 0.03 mm, monoclinic,  $C_2$ ,  $a = 21.614(2)$ ,  $b = 9.8916(8)$ ,  $c = 9.6740(4)$ ,  $\beta = 113.459(2)^\circ$ ,  $U = 1897.3(2)$  Å<sup>3</sup>,  $D_c$  ( $Z = 2$ ) = 1.485 g cm<sup>-3</sup>. A total of 2261 unique data points ( $2\theta_{\text{max}} = 55.0^\circ$ ) were measured at  $T = 123$  K on a Rigaku Mercury CCD camera apparatus (Mo-K $\alpha$  radiation,  $\lambda = 0.71069$  Å). Numerical absorption correction was applied ( $\mu = 21.39$  cm<sup>-1</sup>). The structure was solved by the Patterson method and refined by the full-matrix least-squares method on  $F$  with anisotropic temperature factors for non-hydrogen atoms. Hydrogen atoms were located at the calculated positions. The final  $R$  value is 0.032 for 1777 independent reflections with  $I > 3\sigma I$  and 245 parameters. The maximum residual electron density is 0.37 e<sup>-3</sup>. The axial chirality of this diastereomer was determined to be (*R*) based on the relative stereochemistry to the two asymmetric carbons derived from (*R*)-1,3-butanediol. This molecule is located on the crystallographic 2-fold axis. Atom numbering system is shown in Figure S3b.

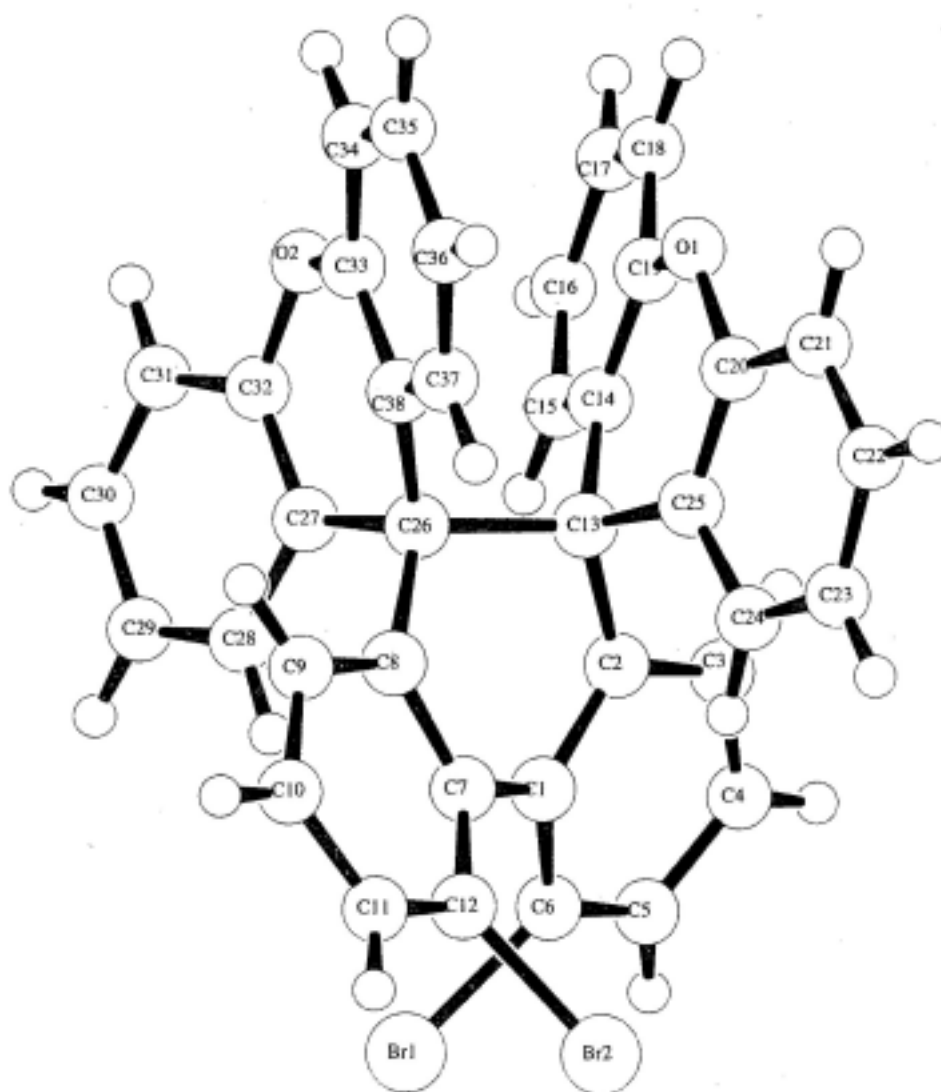

Figure S1. Ortep drawing of *rac*-**1a** showing the atom numbering system. The intramolecular contact between two Br groups is 3.423(1) Å, and the twisting angle around the biphenyl axis is 41.4(1) °.

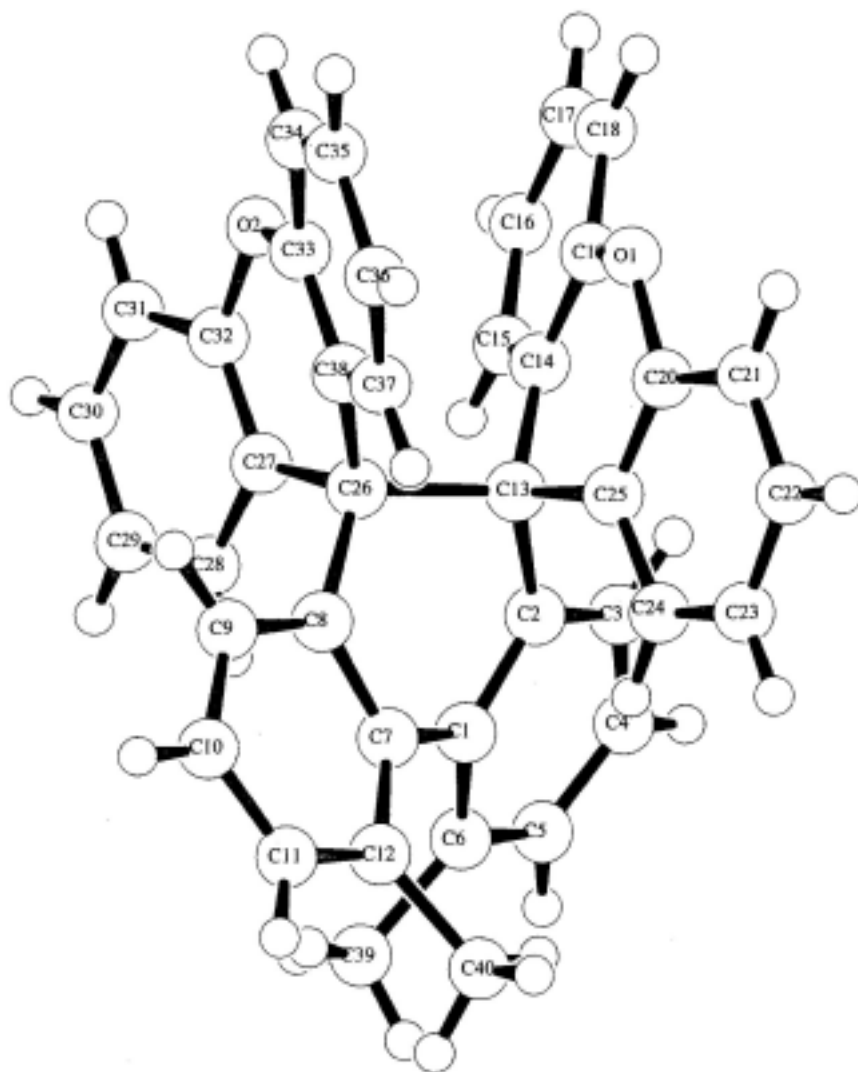

Figure S2. Ortep drawing of *rac*-**1b** showing the atom numbering system. The intramolecular contact between two Me groups is 3.017(7) Å, and the twisting angle around the biphenyl axis is 40.2(1) °.

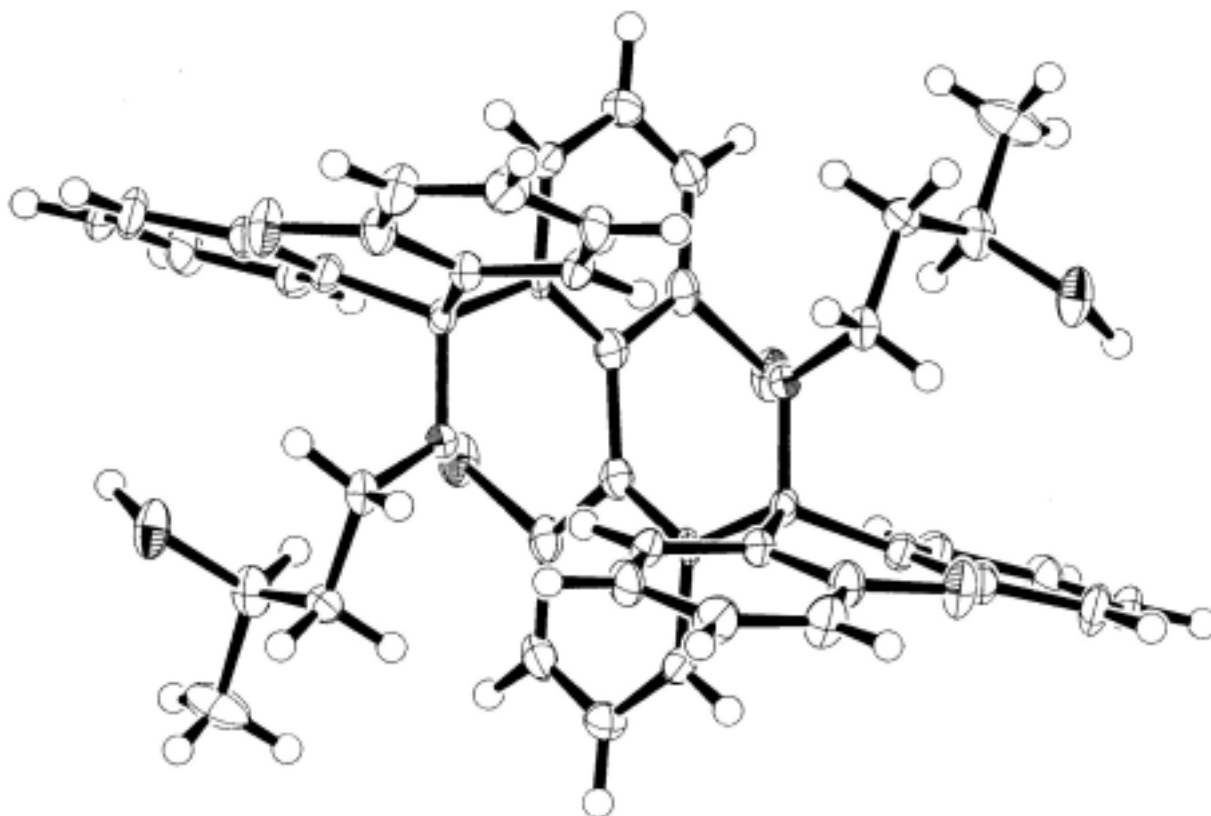

Figure S3a. ORTEP drawing of (*R*)-6. The twisting angle around the biphenyl axis is 89.8 °.

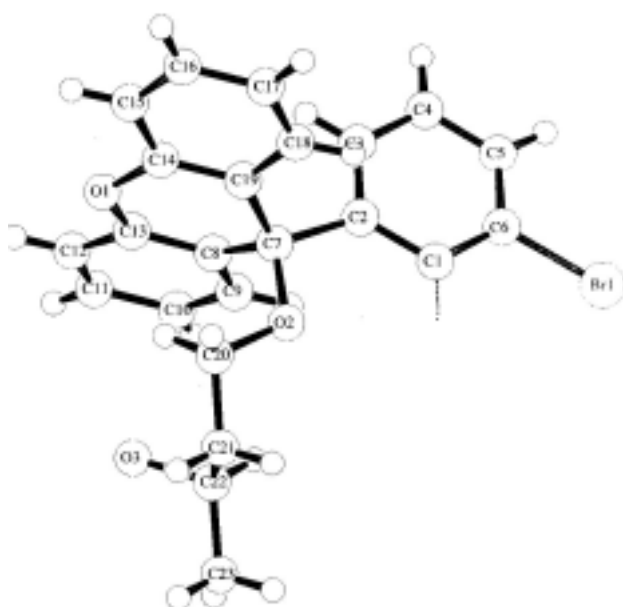

Figure S3b. ORTEP drawing of (*R*)-6 (half unit) showing the atom numbering system.
